# Supplementary material for: The trade-off anionic modulation in metal–organic glasses showing color-tunable persistent luminescence
Source: Royal Society of Chemistry journal article supplement (doi:10.1039/d4mh00771a), 2024-01-01
Supplement: d4mh00771a1.pdf [file d4mh00771a1.pdf]

## Electronic Supplementary Information

### **The trade-off anionic modulation in metal–organic hybrid glasses showing color-tunable persistent luminescence**

*Tianhong Chen, Yu-Juan Ma, Guowei Xiao, Xiaoyu Fang, Yumin Liu, Kangjing Li and*

*Dongpeng Yan\**

Beijing Key Laboratory of Energy Conversion and Storage Materials, and Key Laboratory of Radiopharmaceuticals, Ministry of Education, College of Chemistry, Beijing Normal University, Beijing 100875, P. R. China

Correspondence and requests for materials should be addressed to D. Y. (email: [yandp@bnu.edu.cn](mailto:yandp@bnu.edu.cn)).

## Table of Content

**Fig. S1.** The crystal structure and the asymmetric unit of MeBIM-ZnCl<sub>2</sub>.

**Fig. S2.** The crystal structure and the asymmetric unit of MeBIM-ZnBr<sub>2</sub>.

**Table S1.** Crystallographic data for metal-organic halides at 100 K.

**Fig. S3.** FT-IR spectra for crystals and glasses of (a) MeBIM, (b) MeBIM-Zn(OAc)<sub>2</sub>, (c) MeBIM-ZnCl<sub>2</sub> and (d) MeBIM-ZnBr<sub>2</sub>.

**Fig. S4.** The TGA curves of (a) MeBIM-ZnCl<sub>2</sub>, (b) MeBIM-ZnBr<sub>2</sub> and (c) MeBIM-Zn(OAc)<sub>2</sub>.

**Fig. S5.** (a) Prompt and delayed spectra of ligand MeBIM. (b) The delayed decay of ligand MeBIM at 550 nm.

**Fig. S6.** Quantum yields of (a) MeBIM-Zn(OAc)<sub>2</sub>, (b) MeBIM-ZnCl<sub>2</sub> and (c) MeBIM-ZnBr<sub>2</sub>.

**Fig. S7.** (a) Solid-state UV-vis absorption spectra and (b) the corresponding Tauc plots of organic ligand MeBIM, MeBIM-Zn(OAc)<sub>2</sub>, MeBIM-ZnCl<sub>2</sub> and MeBIM-ZnBr<sub>2</sub>.

**Fig. S8.** Photographs of the SDA/C6/RB-doped MeBIM-ZnCl<sub>2</sub> glasses captured after removing the 365 nm UV source.

**Fig. S9.** Delayed PL spectra of (a) 1‰ SDA, (b) 1‰ C6 and (c) 1‰ RB-doped MeBIM-ZnCl<sub>2</sub> were performed under the excitation wavelength at 365 nm. Insert: photographs of (a) 1‰ SDA, (b) 1‰ C6 and (c) 1‰ RB-doped MeBIM-ZnCl<sub>2</sub> glasses under 365 nm UV light. The decay profiles were obtained for (d) 1‰ SDA, (e) 1‰ C6 and (f) 1‰ RB-doped MeBIM-ZnCl<sub>2</sub> glasses.

**Fig. S10.** Prompt PL spectra of (a) 1‰ SDA, (b) 1‰ C6 and (c) 1‰ RB-doped MeBIM-Zn(OAc)<sub>2</sub> were performed under the excitation wavelength at 365 nm. Insert: photographs of (a) 1‰ SDA, (b) 1‰ C6 and (c) 1‰ RB-doped MeBIM-Zn(OAc)<sub>2</sub> glasses under 365 nm UV light. The decay profiles were obtained for (d) 1‰ SDA, (e) 1‰ C6 and (f) 1‰ RB-doped MeBIM-Zn(OAc)<sub>2</sub> glasses.

**Fig. S11.** Prompt and delayed PL spectra of (a,d) 1‰ SDA, (b,e) 1‰ C6 and (c,f) 1‰ RB-doped MeBIM-ZnBr<sub>2</sub> were performed under the excitation wavelength at 365 nm. Insert: photographs of (a) 1‰ SDA, (b) 1‰ C6 and (c) 1‰ RB-doped MeBIM-ZnBr<sub>2</sub> glasses under 365 nm UV light. The decay profiles were obtained for (g) 1‰ SDA, (h) 1‰ C6 and (i) 1‰ RB-doped MeBIM-ZnBr<sub>2</sub> glasses.

**Fig. S12.** (a-e) PDOS plots of each atom in MeBIM-Zn(OAc)<sub>2</sub>.

**Fig. S13.** (a-e) PDOS plots of each atom in MeBIM-ZnCl<sub>2</sub>.

**Fig. S14.** (a-e) PDOS plots of each atom in MeBIM-ZnBr<sub>2</sub>.

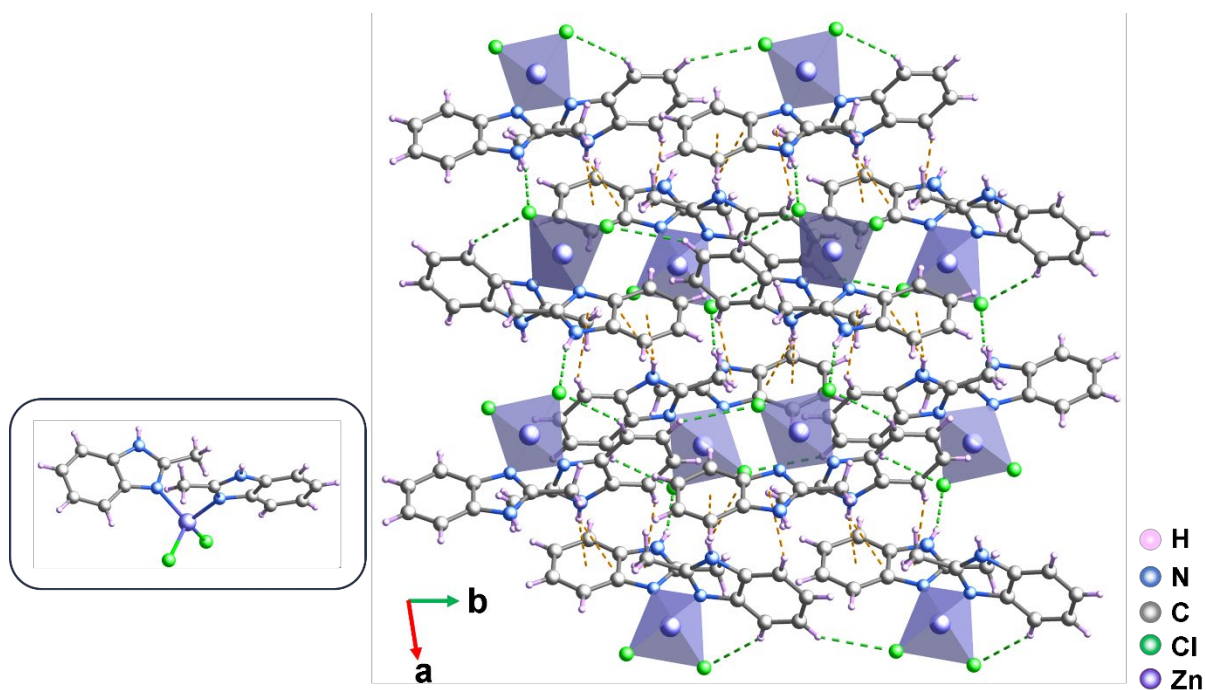

**Fig. S1.** The crystal structure and the asymmetric unit of MeBIM-ZnCl<sub>2</sub>.

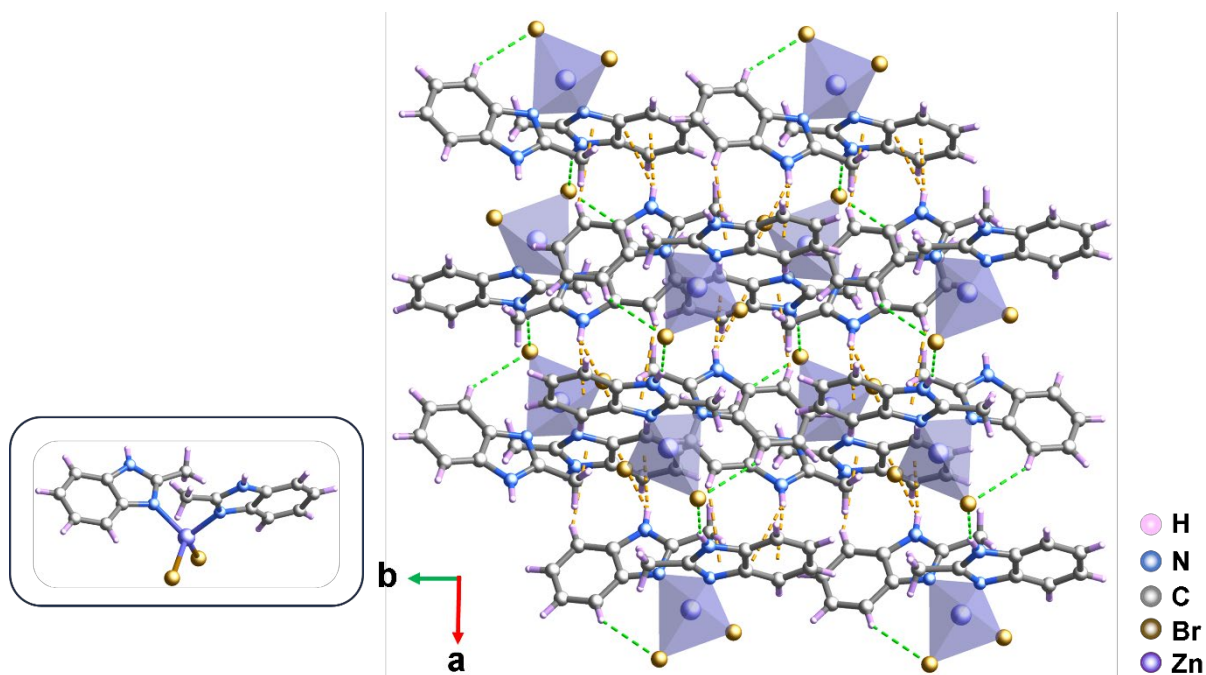

**Fig. S2.** The crystal structure and the asymmetric unit of MeBIM-ZnBr<sub>2</sub>.

**Table S1.** Crystallographic data for metal-organic halides at 100 K

|                                 | MeBIM-Zn(OAc) <sub>2</sub>                                       | MeBIM-ZnCl <sub>2</sub>                                           | MeBIM-ZnBr <sub>2</sub>                                           |
|---------------------------------|------------------------------------------------------------------|-------------------------------------------------------------------|-------------------------------------------------------------------|
| Formula                         | C <sub>20</sub> H <sub>28</sub> N <sub>4</sub> O <sub>7</sub> Zn | C <sub>16</sub> H <sub>14</sub> Cl <sub>2</sub> N <sub>4</sub> Zn | C <sub>16</sub> H <sub>14</sub> Br <sub>2</sub> N <sub>4</sub> Zn |
| Mr (g·mol <sup>-1</sup> )       | 501.83                                                           | 398.58                                                            | 487.50                                                            |
| Crystal system                  | monoclinic                                                       | monoclinic                                                        | monoclinic                                                        |
| Space group                     | C2/c                                                             | P2 <sub>1</sub> /n                                                | P2 <sub>1</sub> /n                                                |
| a/Å                             | 8.33375(17)                                                      | 12.5588(2)                                                        | 12.6057(2)                                                        |
| b/Å                             | 16.2999(3)                                                       | 9.78700(10)                                                       | 9.93930(10)                                                       |
| c/Å                             | 15.9774(3)                                                       | 14.6063(2)                                                        | 14.6509(2)                                                        |
| α/°                             | 90                                                               | 90                                                                | 90                                                                |
| β/°                             | 96.7823(18)                                                      | 111.748(2)                                                        | 110.1050(10)                                                      |
| γ/°                             | 90                                                               | 90                                                                | 90                                                                |
| Volume/Å <sup>3</sup>           | 2155.18(7)                                                       | 1667.52(4)                                                        | 1723.78(4)                                                        |
| Z                               | 4                                                                | 4                                                                 | 4                                                                 |
| μ/mm <sup>-1</sup>              | 2.028                                                            | 5.016                                                             | 7.432                                                             |
| F(000)                          | 1048.0                                                           | 808.0                                                             | 952.0                                                             |
| Index ranges                    | -10 ≤ h ≤ 10,<br>-20 ≤ k ≤ 20,<br>-20 ≤ l ≤ 19                   | -15 ≤ h ≤ 14,<br>-12 ≤ k ≤ 12,<br>-17 ≤ l ≤ 18                    | -15 ≤ h ≤ 15,<br>-12 ≤ k ≤ 12,<br>-18 ≤ l ≤ 15                    |
| Reflections collected           | 12344                                                            | 20726                                                             | 21144                                                             |
| Unique reflections              | 2235                                                             | 3431                                                              | 3560                                                              |
| R <sub>int</sub>                | 0.0666                                                           | 0.0408                                                            | 0.0391                                                            |
| GOF on F <sup>2</sup>           | 1.062                                                            | 1.079                                                             | 1.103                                                             |
| R <sub>p</sub> ,wR [I ≥ 2σ (I)] | 0.0388, 0.1027                                                   | 0.0276, 0.0737                                                    | 0.0241, 0.0605                                                    |
| R <sub>p</sub> ,wR [all data]   | 0.0391, 0.1029                                                   | 0.0283, 0.0740                                                    | 0.0248, 0.0610                                                    |

$$^a R_1 = \sum \frac{\|F_o| - |Fc||}{|F_o|}, \quad ^b wR_2 = \left\{ \frac{\sum [w(F_o^2 - F_c^2)^2]}{\sum w(F_o^2)^2} \right\}^{1/2}.$$

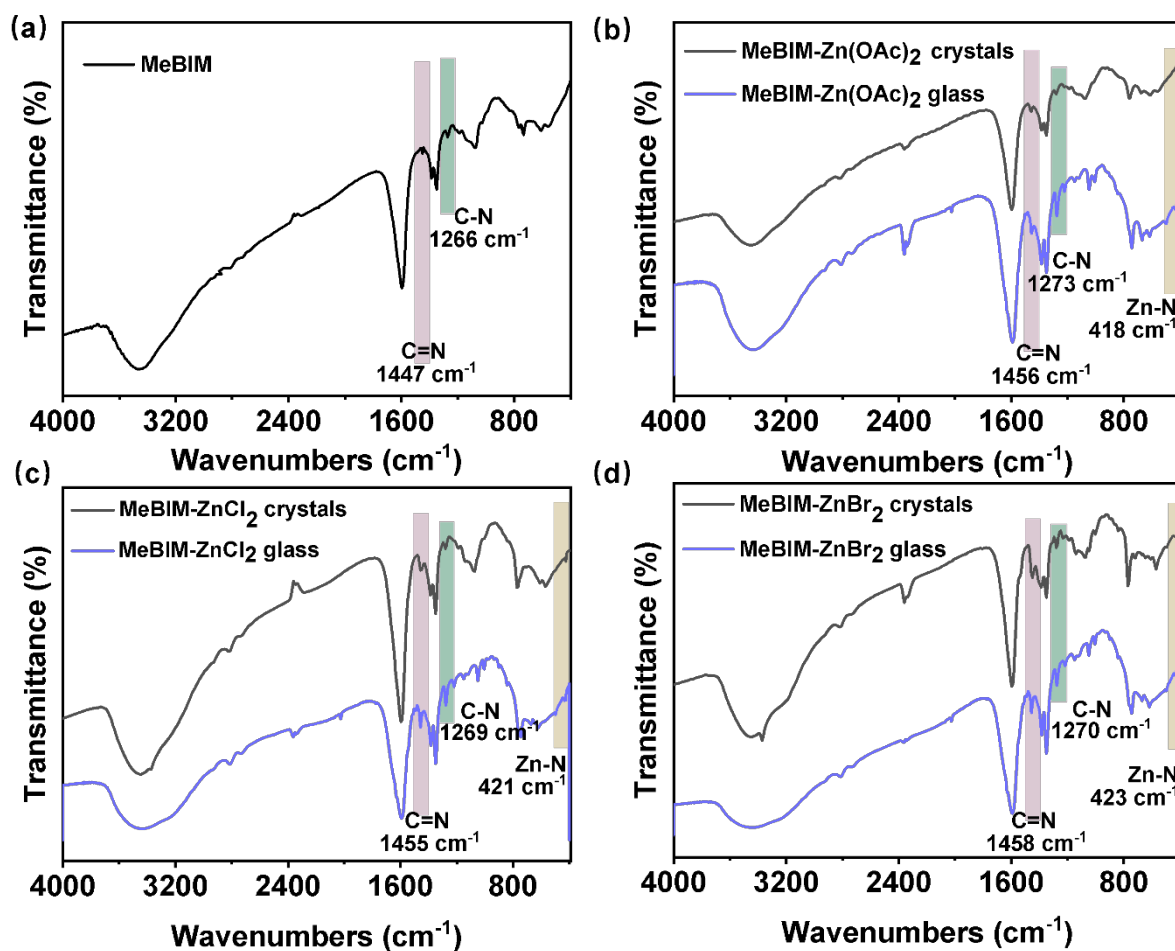

**Fig. S3.** FT-IR spectra for crystals and glasses of (a) MeBIM, (b) MeBIM- $\text{Zn}(\text{OAc})_2$ , (c) MeBIM- $\text{ZnCl}_2$  and (d) MeBIM- $\text{ZnBr}_2$ .

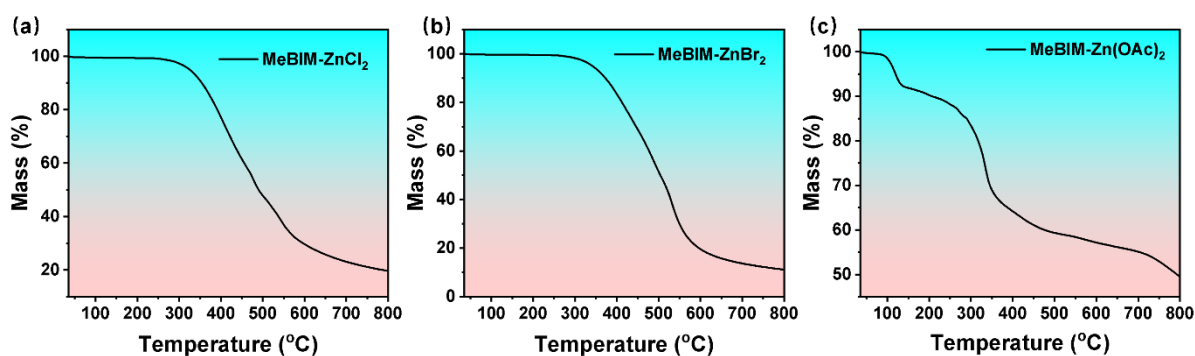

**Fig. S4.** The TGA curves of (a) MeBIM- $\text{ZnCl}_2$ , (b) MeBIM- $\text{ZnBr}_2$  and (c) MeBIM- $\text{Zn}(\text{OAc})_2$ .

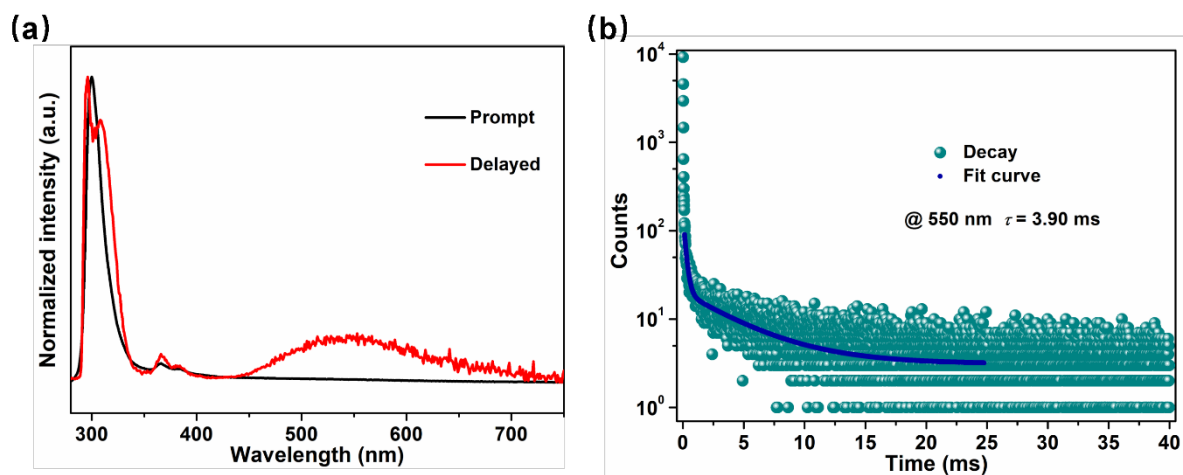

**Fig. S5.** (a) Prompt and delayed spectra of ligand MeBIM. (b) The delayed decay of ligand MeBIM at 550 nm.

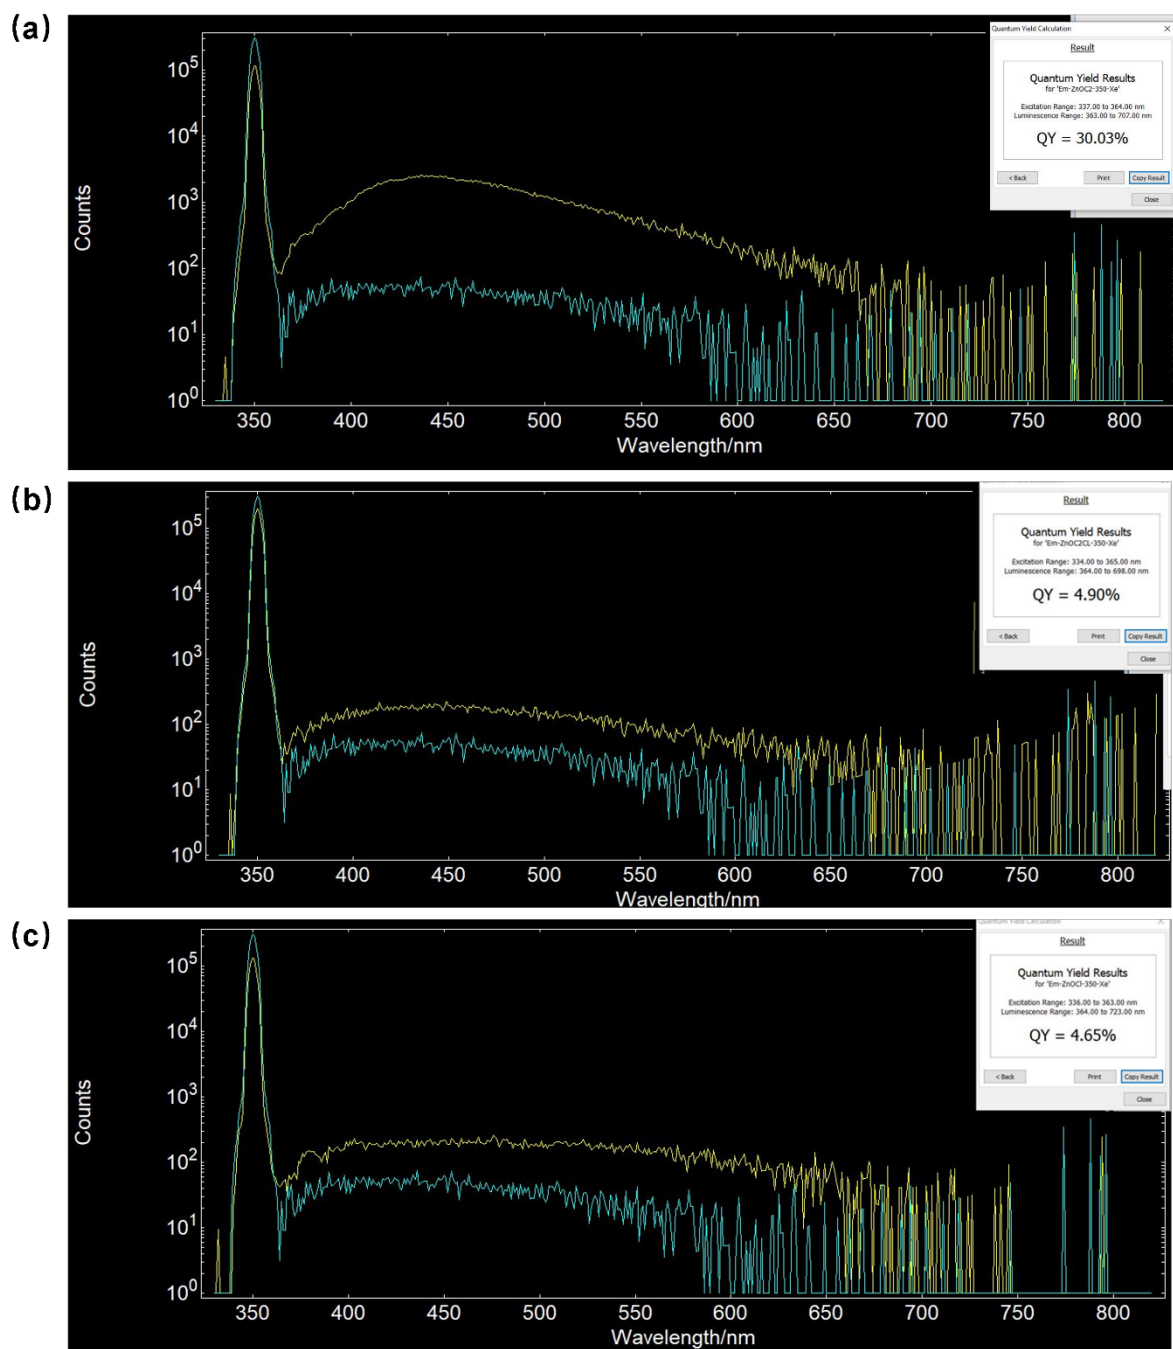

**Fig. S6.** Quantum yields of (a) MeBIM-Zn(OAc)<sub>2</sub>, (b) MeBIM-ZnCl<sub>2</sub> and (c) MeBIM-ZnBr<sub>2</sub>.

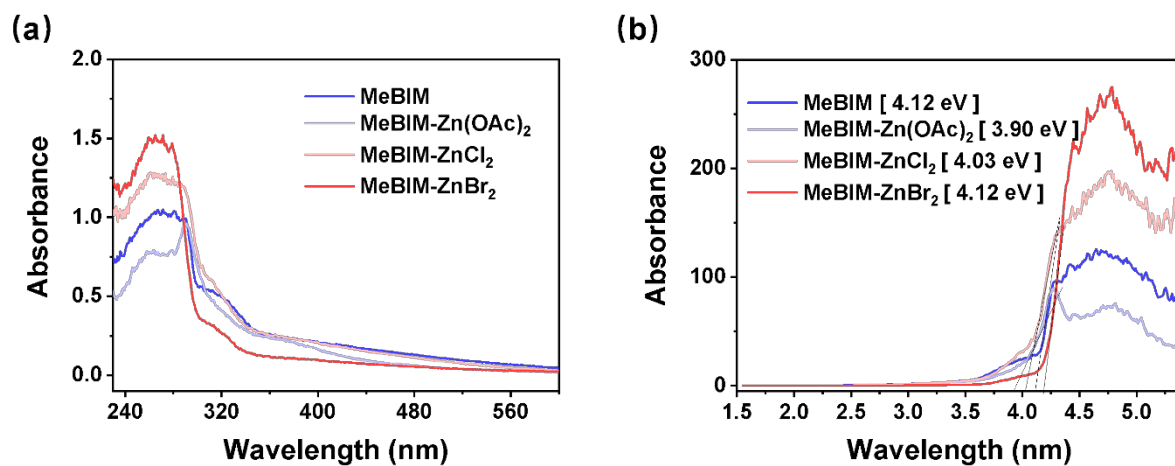

**Fig. S7.** (a) Solid-state UV-vis absorption spectra and (b) the corresponding Tauc plots of organic ligand MeBIM, MeBIM-Zn(OAc)<sub>2</sub>, MeBIM-ZnCl<sub>2</sub> and MeBIM-ZnBr<sub>2</sub>.

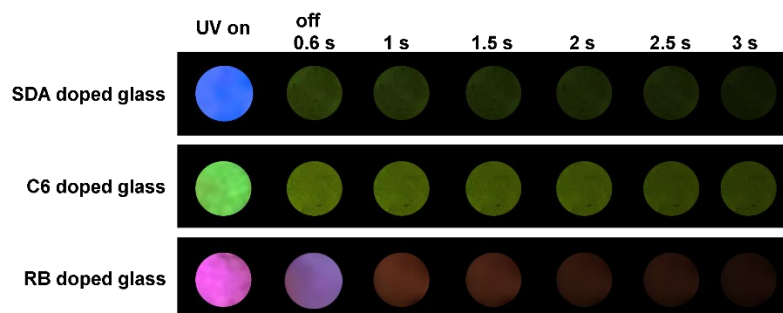

**Fig. S8.** Photographs of the SDA/C6/RB-doped MeBIM-ZnCl<sub>2</sub> glasses captured after removing the 365 nm UV source.

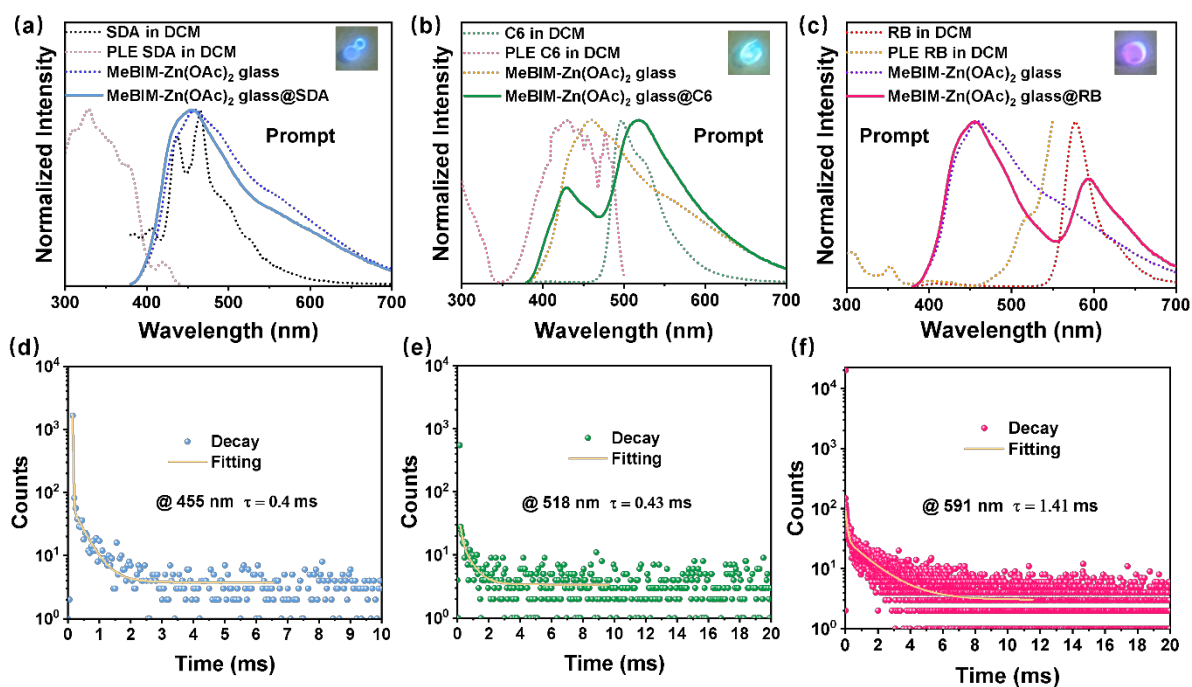

**Fig. S9.** Delayed PL spectra of (a) 1‰ SDA, (b) 1‰ C6 and (c) 1‰ RB-doped MeBIM-ZnCl<sub>2</sub> were performed under the excitation wavelength at 365 nm. Insert: photographs of (a) 1‰ SDA, (b) 1‰ C6 and (c) 1‰ RB-doped MeBIM-ZnCl<sub>2</sub> glasses under 365 nm UV light. The decay profiles were obtained for (d) 1‰ SDA, (e) 1‰ C6 and (f) 1‰ RB-doped MeBIM-ZnCl<sub>2</sub> glasses.

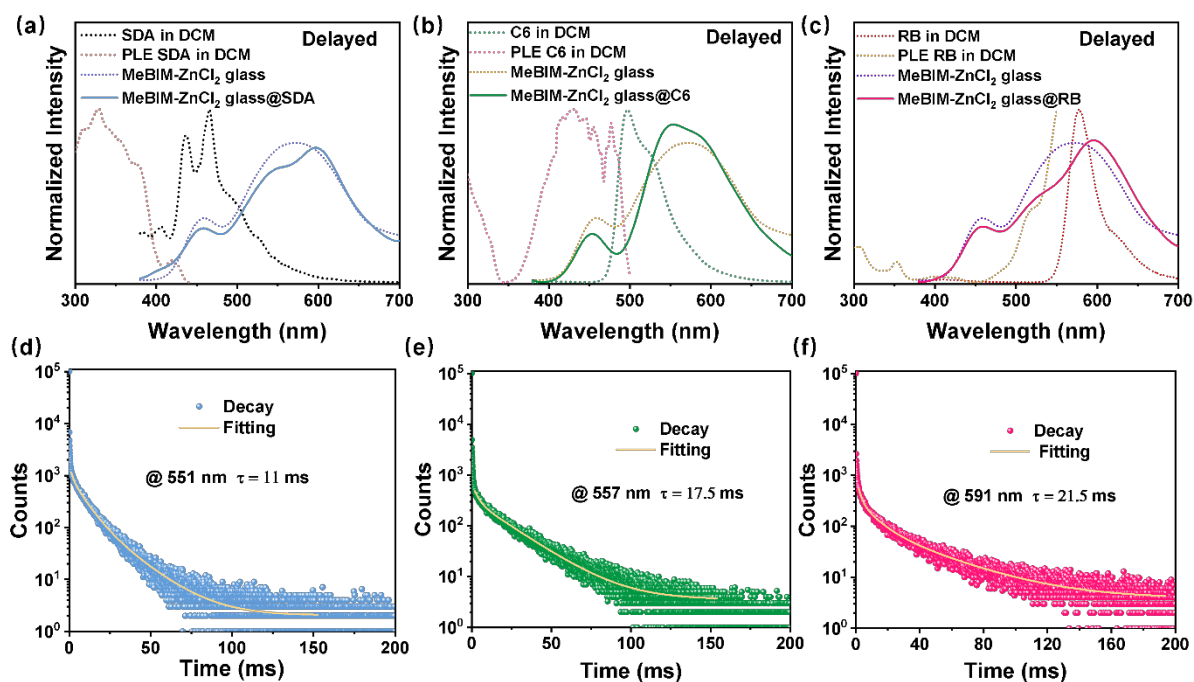

**Fig. S10.** Prompt PL spectra of (a) 1% SDA, (b) 1% C6 and (c) 1% RB-doped MeBIM-Zn(OAc)<sub>2</sub> were performed under the excitation wavelength at 365 nm. Insert: photographs of (a) 1% SDA, (b) 1% C6 and (c) 1% RB-doped MeBIM-Zn(OAc)<sub>2</sub> glasses under 365 nm UV light. The decay profiles were obtained for (d) 1% SDA, (e) 1% C6 and (f) 1% RB-doped MeBIM-Zn(OAc)<sub>2</sub> glasses.

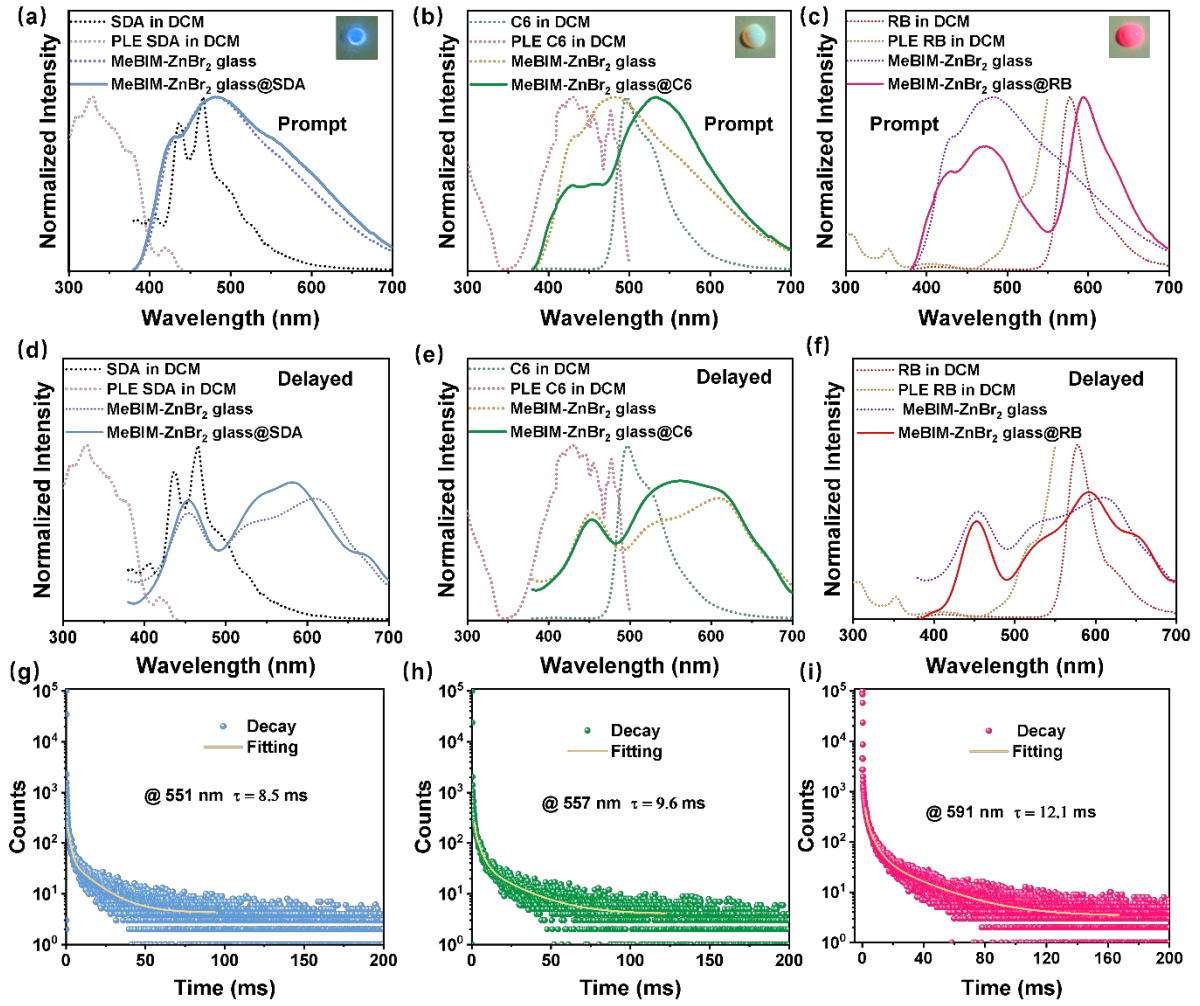

**Fig. S11.** Prompt and delayed PL spectra of (a,d) 1‰ SDA, (b,e) 1‰ C6 and (c,f) 1‰ RB-doped MeBIM-ZnBr<sub>2</sub> were performed under the excitation wavelength at 365 nm. Insert: photographs of (a) 1‰ SDA, (b) 1‰ C6 and (c) 1‰ RB-doped MeBIM-ZnBr<sub>2</sub> glasses under 365 nm UV light. The decay profiles were obtained for (g) 1‰ SDA, (h) 1‰ C6 and (i) 1‰ RB-doped MeBIM-ZnBr<sub>2</sub> glasses.

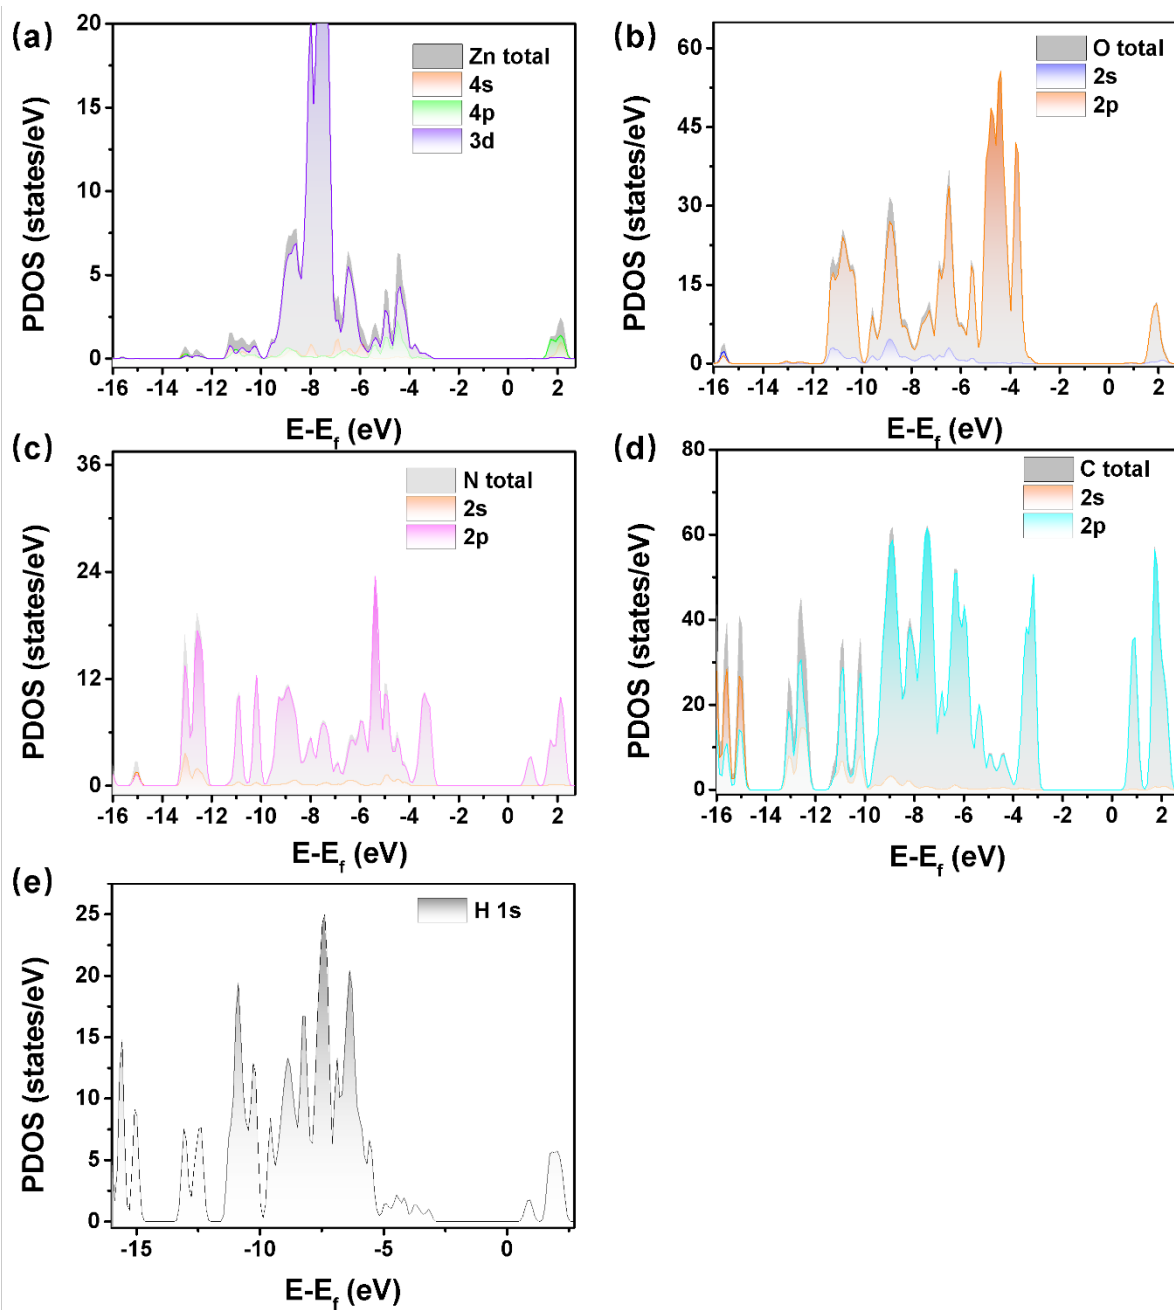

**Fig. S12.** (a-e) PDOS plots of each atom in MeBIM-Zn(OAc)<sub>2</sub>.

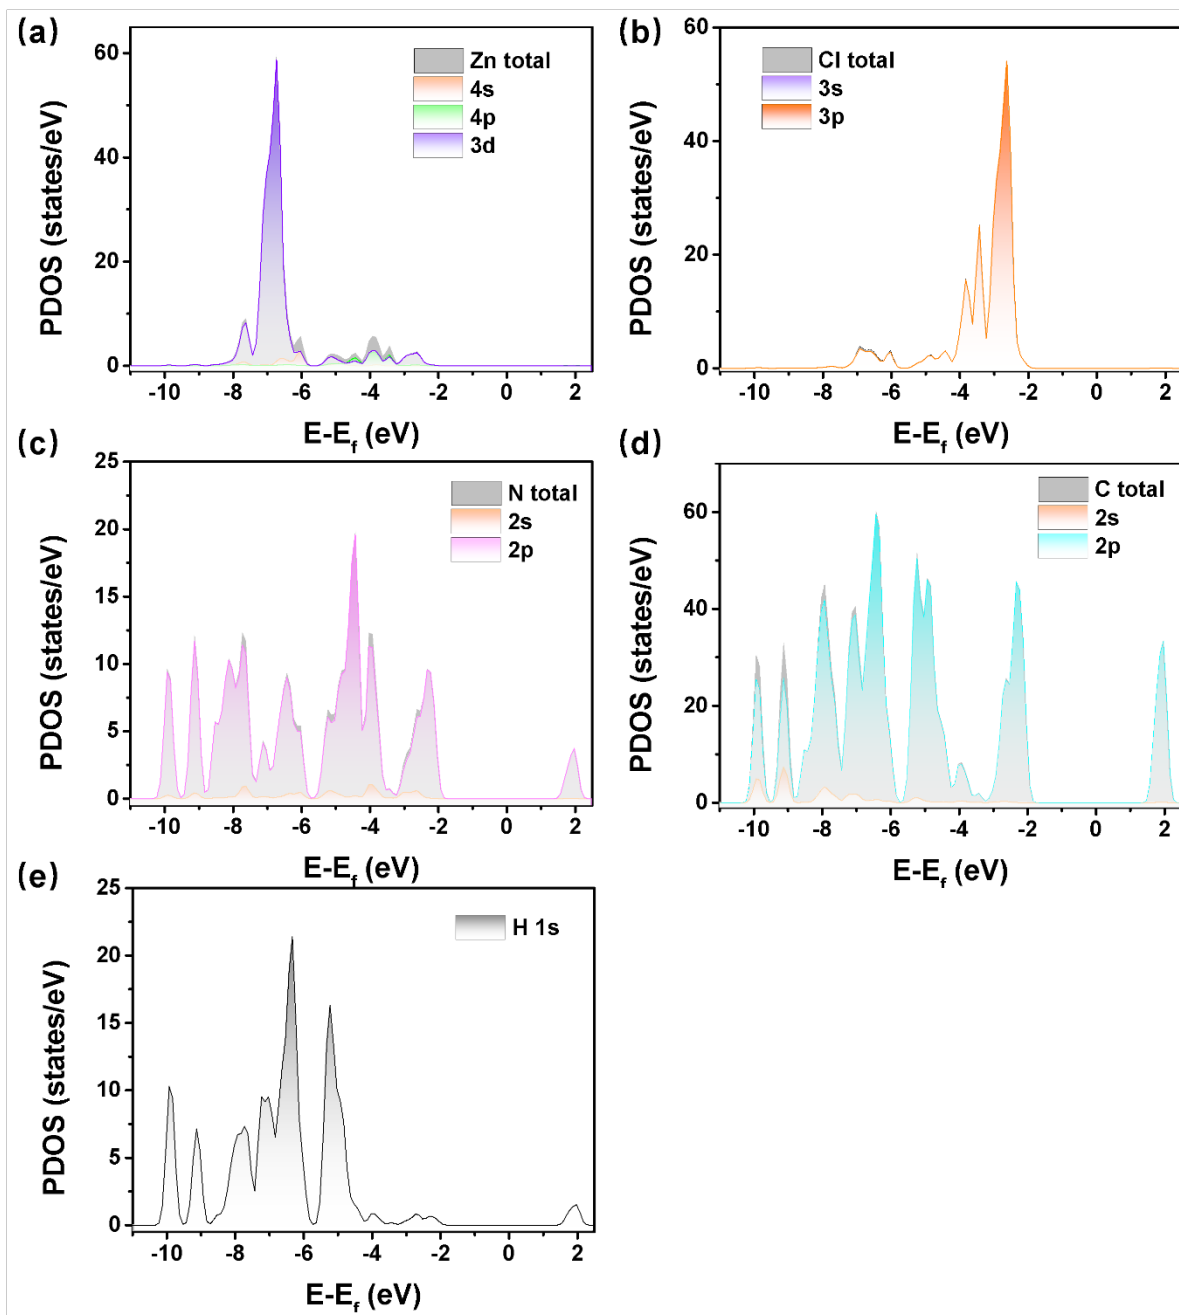

**Fig. S13.** (a-e) PDOS plots of each atom in MeBIM-ZnCl<sub>2</sub>.

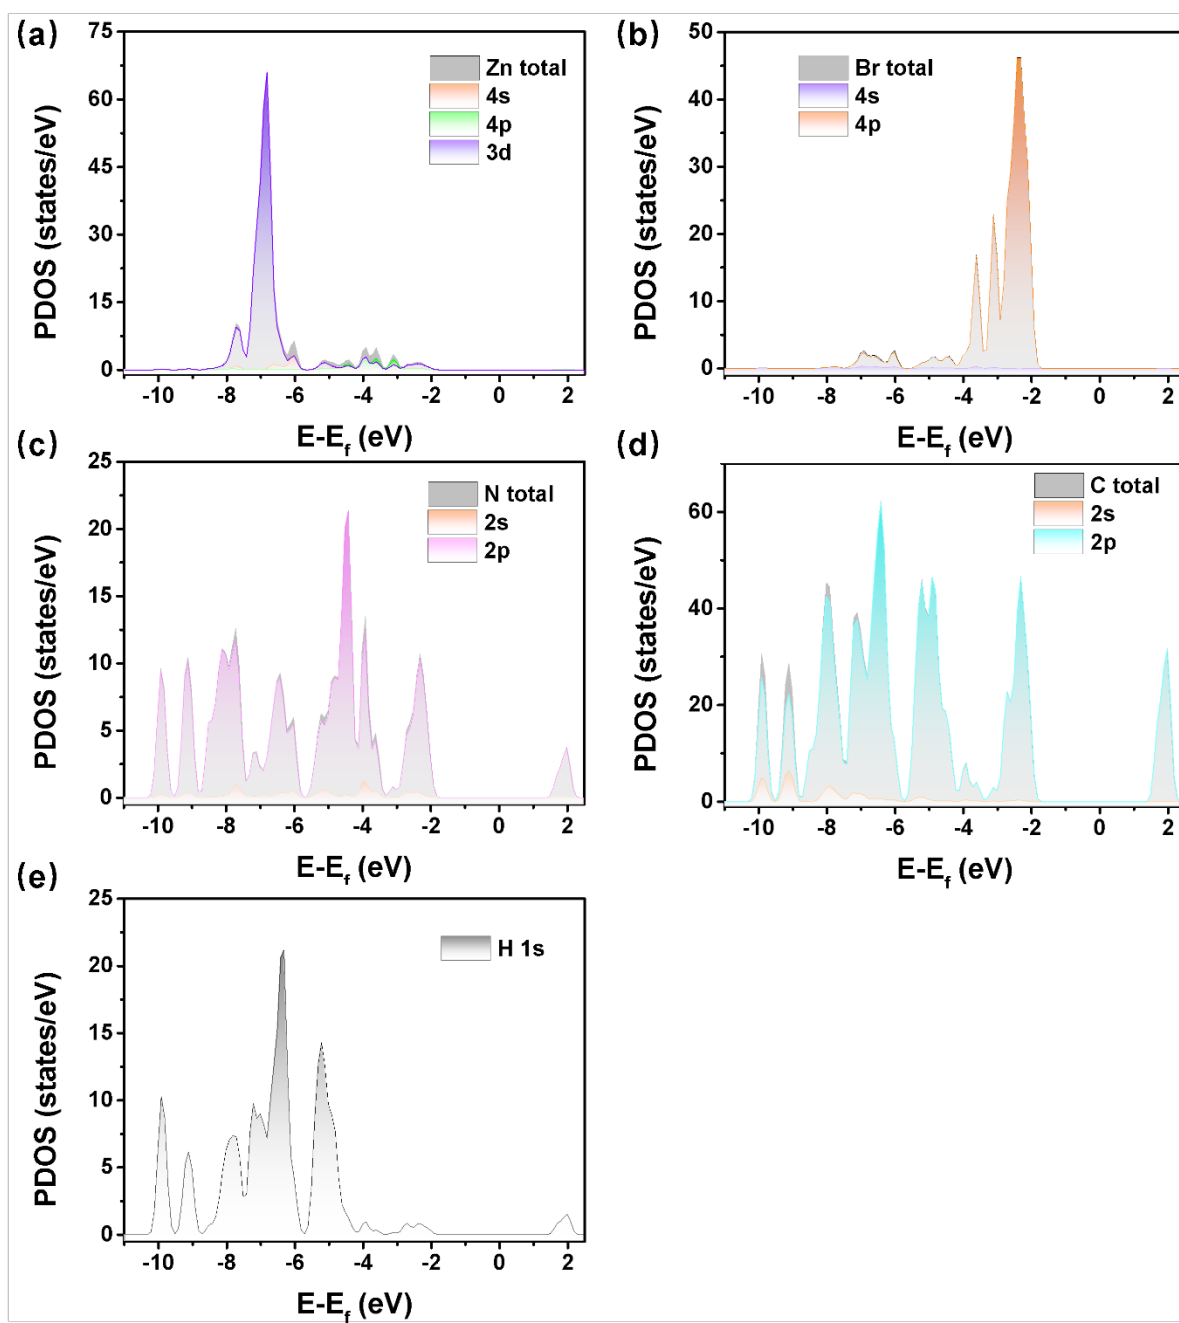

**Fig. S14.** (a-e) PDOS plots of each atom in MeBIM-ZnBr<sub>2</sub>.
